# Supplementary material
Source: Springer Nature journal article supplement (https://www.springermedizin.de/resource/supplementary/12885_2012_3627_MOESM1_ESM.pdf/9464560)

**Risk factor**

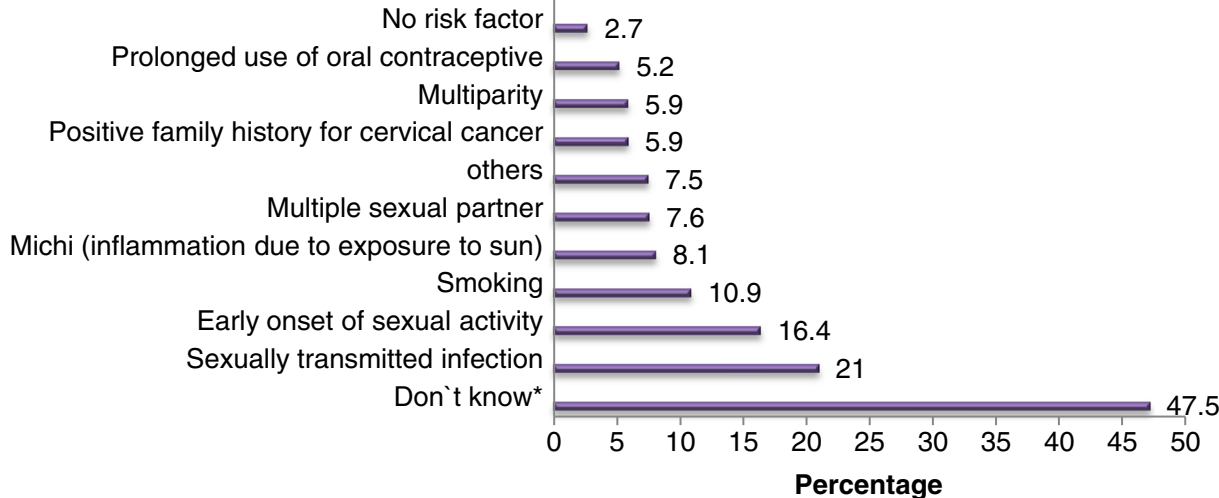

Supplement: MOESM1 [file 9464560]
